# Supplementary material for: CRISPR/Cas9-Mediated Insertion of loxP Sites in the Mouse Dock7 Gene Provides an Effective Alternative to Use of Targeted Embryonic Stem Cells
Source: PubMed Central journal article supplement (PMC4938658; doi:10.1534/g3.116.030601), 2016-05-11
Supplement: supp_g3.116.030601_TableS1.pdf [file supp_g3.116.030601_TableS1.pdf]

| Primer pair | Forward (5'-3')               | Reverse (5'-3')        |
|-------------|-------------------------------|------------------------|
| Neo-loxP2A  | TCCCCCTGAACCTGAAACATAA        | TCATTTTATCCGCCTACTGCGA |
| Neo-loxP2B  | CTCCCCCTGAACCTGAAACATAA<br>A  | CTCGAAACCCTCACGTACAGAC |
| LoxP3       | CATTATACGAAGTTATGGTCTGA<br>GC | AGAAGAACACGAGAACGCCTTT |
| PCR Control | TGTTGGTGTTCAGAGAAAGTTGGC      | CCTCGGGGGAAAGCACTG     |

**Table S1. *Dock7<sup>tm1a</sup>* genotyping primer pairs.** Sequences of primers used for genotyping of the *Dock7<sup>tm1a</sup>* cassette are listed. Forward (F) and reverse (R) primers are abbreviated accordingly. The PCR control is located in *Dock7* exon 18, approximately 68 kb downstream of the cassette insertion. All primer pairs were used with the MasterTaq thermocycling protocol described in [Table S2](#).
