# Supplementary material for: CRISPR/Cas9-Mediated Insertion of loxP Sites in the Mouse Dock7 Gene Provides an Effective Alternative to Use of Targeted Embryonic Stem Cells
Source: PubMed Central journal article supplement (PMC4938658; doi:10.1534/g3.116.030601), 2016-05-11
Supplement: supp_g3.116.030601_TableS2.pdf [file supp_g3.116.030601_TableS2.pdf]

|                         | <b>MasterTaq<br/>(5 prime)</b>                                                                                                                                                                                 | <b>AccuStart II PCR<br/>SuperMix (Quanta<br/>Biosciences)</b>                                                                                        | <b>JumpStart Taq<br/>(Sigma)</b>                                                                                                                     | <b>Terra Taq<br/>(Clontech)</b>                                                                                                                                                      | <b>Phusion Polymerase<br/>(NEB)</b>                                                                                                                                                                                             |
|-------------------------|----------------------------------------------------------------------------------------------------------------------------------------------------------------------------------------------------------------|------------------------------------------------------------------------------------------------------------------------------------------------------|------------------------------------------------------------------------------------------------------------------------------------------------------|--------------------------------------------------------------------------------------------------------------------------------------------------------------------------------------|---------------------------------------------------------------------------------------------------------------------------------------------------------------------------------------------------------------------------------|
| <b>Cycling</b>          | 1. 97°C; 30 sec<br>2. 94°C; 15 sec<br>3. 55°C; 30 sec<br>4. 72°C; 30 sec<br>+1 sec/cycle<br>39 cycles (steps 2-4)<br>5. 72°C; 10 min                                                                           | 1. 95°C; 2 min<br>2. 95°C; 15 sec<br>3. 60°C; 15 sec<br>4. 72°C; 20 sec<br>35 cycles (steps 2-4)                                                     | 1. 95°C; 5 min<br>2. 95°C; 30 sec<br>3. 60°C; 30 sec<br>4. 68°C; 40 sec<br>5. cycles (steps 2-4)<br>6. 68°C; 5 min                                   | 1. 98°C; 2 min<br>2. 98°C; 10 sec<br>3. 60°C; 15 sec<br>4. 68°C; 1 min<br>26 cycles (steps 2-4)                                                                                      | 1. 98°C; 30 sec<br>2. 98°C; 10 sec<br>3. 60°C*; 30 sec<br>4. 72°C; 30 sec<br>39 cycles (steps 2-4)<br>5. 72°C; 10 min<br><br>*Annealing temp of<br>55°C was used for oligo<br>cloning                                           |
| <b>PCR<br/>reaction</b> | ddH <sub>2</sub> O           16.4 µL<br>10x Buffer           2.5 µL<br>5 mM dNTPs       1.0 µL<br>10 µM F primer   1.0 µL<br>10 µM R primer   1.0 µL<br>DNA                3.0 µL<br>Polymerase        0.10 µL | ddH <sub>2</sub> O            6.5 µL<br>2x Mix             12.5 µL<br>10 µM F primer   2.5 µL<br>10 µM R primer   2.5 µL<br>DNA               1.0 µL | ddH <sub>2</sub> O            6.5 µL<br>2x Mix             12.5 µL<br>10 µM F primer   2.5 µL<br>10 µM R primer   2.5 µL<br>DNA               1.0 µL | ddH <sub>2</sub> O            9.5 µL<br>2x Buffer           12.5 µL<br>10 µM F primer   0.75 µL<br>10 µM R primer   0.75 µL<br>DNA               1.0 µL<br>Taq                0.5 µL | ddH <sub>2</sub> O            14.25 µL<br>5x Buffer           5.0 µL<br>5 mM dNTPs       1.0 µL<br>10 µM F primer   1.25 µL<br>10 µM R primer   1.25 µL<br>DNA or            2.0 µL<br>10 ng oligo<br>Polymerase        0.25 µL |

**Table S2. Cycling condition and reaction components for genotyping and cloning.**
