# Supplementary material for: CRISPR/Cas9-Mediated Insertion of loxP Sites in the Mouse Dock7 Gene Provides an Effective Alternative to Use of Targeted Embryonic Stem Cells
Source: PubMed Central journal article supplement (PMC4938658; doi:10.1534/g3.116.030601), 2016-05-11
Supplement: supp_g3.116.030601_TableS3.pdf [file supp_g3.116.030601_TableS3.pdf]

| LoxP site: | sgRNA target recognition sites with genomic coordinates | Oligonucleotide (w/ <u>loxP site</u> )                                                                                                                                                                 |
|------------|---------------------------------------------------------|--------------------------------------------------------------------------------------------------------------------------------------------------------------------------------------------------------|
| LoxP4      | acgctccacaccctgacccatgg<br>chr4:+98750272               | tccatcttgggcctttaaccatgtgcaaagactctccctctactttatttcattacattagcatgtg<br>cagtggccatgataacttcgtatagcatacattatacgaagttatgtcaggggtgggagcgttttgg<br>gagctttacctgccacagtctggtcacagtattgctagaatgatcccagtaacaac |
| LoxP5      | gggttggttcctagctacactgg<br>chr4:-98748262               | agtgatgtggggctggagaggaggctctagtttagagcactggctattcttgagaggacctgggt<br>ttggtcctagctataacttcgtatagcatacattatacgaagttatcactggcatctaacagccatc<br>tctacctctgatccaggtatctgacatcctcttctgtgagcagtgcacatgggtg    |
| LoxP6      | ccaaccattgagctagcttaggg<br>chr4:+98744990               | ttccagacacccaatgctctggagtccccacataaaaggcacaatgtacagccttattttaata<br>taccctaaataacttcgtatagcatacattatacgaagttatggatccaatggtgggcacttcaa<br>acctctcacagctagcacacactcccctccagtatacctgagttaacactttcta       |

**Table S3. *Dock7* CRISPR reagents.** Sequences of the sgRNA, sgRNA genomic coordinates, and the sequence of oligonucleotides loxP donors are listed. The loxP site is underlined in the oligonucleotide. Genomic coordinates are expressed in the NCBI37/mm9 build.
