# Supplementary material for: CRISPR/Cas9-Mediated Insertion of loxP Sites in the Mouse Dock7 Gene Provides an Effective Alternative to Use of Targeted Embryonic Stem Cells
Source: PubMed Central journal article supplement (PMC4938658; doi:10.1534/g3.116.030601), 2016-05-11
Supplement: supp_g3.116.030601_TableS4.pdf [file supp_g3.116.030601_TableS4.pdf]

| Primer pair | Analysis |   |   | Forward (5'-3')                   | Reverse (5'-3')                    | PCR |   |   |
|-------------|----------|---|---|-----------------------------------|------------------------------------|-----|---|---|
|             | G        | C | S |                                   |                                    | J   | T | P |
| LoxP4A      | x        | x |   | CCAGCGTACACAGCCCAGATCA            | CGAAACCCTCACGTACAGACTCTCC          | X   | X |   |
| LoxP4B      | x        |   | x | GCCCAGATCACCCCTTGTCTC             | TGCTAAGTTTCTAAAAGCTGCCT            |     | X |   |
| LoxP5A      | x        | x |   | TGAAGAAGGGTCTTCATTCTAGA<br>ACATTT | TCACACTTAAACTAACAAGGTTATCAG<br>GGT | X   | X |   |
| LoxP5B      | x        |   | x | TTCACTGATGGAATAATCTGTGCT          | GCAGCCAAGAGGGGCAAAAC               |     | X |   |
| LoxP6A      | x        | x | x | GTAAATTCTTCCTGGCTGGGGT            | TTCCATAGGATGGACCAAGCAG             | X   | X |   |
| LoxP6B      | x        |   |   | GAGACAAGACTCTTTGTTTCTC            | GGTCTTTGATTTGTGCTTACAG             | X   |   |   |
| cKO1 ΔA     |          | x |   | CCAGCGTACACAGCCCAGATCA            | TCACACTTAAACTAACAAGGTTATCAG<br>GGT |     | X |   |
| cKO1 ΔB     | x        |   | x | GCCCAGATCACCCCTTGTCTC             | GCAGCCAAGAGGGGCAAAAC               |     | X |   |
| cKO2 Δ      | x        |   |   | GCCCAGATCACCCCTTGTCTC             | TTCCATAGGATGGACCAAGCAG             |     | X |   |
| Oligo4      |          | x |   | GGACAGTGTCTCCATCTTGG              | CATTTTATCTGTTGTTACTGG              |     |   | X |
| Oligo5      |          | x |   | ATTACTAACATAAGTGATGTGG            | TGGA ACTCTGTGCACCATGTGC            |     |   | X |
| T7 promoter |          |   | x | TAATACGACTCACTATAGGG              |                                    |     |   |   |

**Table S4. *Dock7* CRISPR primer pairs.** Primer pairs were used to analyze the *Dock7* gene by genotyping (G), cloning (C), and sequencing (S).

The cKO1 Δ primer pairs were used to assess deletion of exons 3 and 4 in the *Dock7* gene. The cKO2 Δ primer pairs used to assess deletion of exons 3 through 7 in the *Dock7* gene. The amplification of isolated DNA was performed according to the Jumpstart (J), Terra Taq (T), or Phusion polymerase (P) protocols described in [Table S2](#). Forward (F) and reverse (R) primers are abbreviated accordingly.
