# Supplementary material for: CRISPR/Cas9-Mediated Insertion of loxP Sites in the Mouse Dock7 Gene Provides an Effective Alternative to Use of Targeted Embryonic Stem Cells
Source: PubMed Central journal article supplement (PMC4938658; doi:10.1534/g3.116.030601), 2016-05-11
Supplement: supp_g3.116.030601_TableS5.pdf [file supp_g3.116.030601_TableS5.pdf]

| Primer pair | Off target site (NCBI37/mm9) | Forward (5'-3')                    | Reverse (5'-3')                 |
|-------------|------------------------------|------------------------------------|---------------------------------|
| LoxP4ot 1   | chr15:+72611911              | TCTATTCAAGATTAAGGTACTG<br>GCTGGC   | ACTTCATTCACAAAGGCCTGAC<br>CA    |
| LoxP4ot 2   | chr16:+42168470              | ACAGCCATATAGTGTGGTCTCA<br>TGCA     | GCAACTTGGCAATGGATTACT<br>TGAAT  |
| LoxP4ot 3   | chr7:+28954978               | TGAAGCCAGGTAAGGACCACG<br>G         | GGACCAAGGTATCGTTGACAG<br>G      |
| LoxP4ot 4   | chr4:+117809504              | CTCTTGAGAAGACCGTAGTCC<br>AATCCT    | GGAGGGCTTCATACCTTGCTCT<br>GTATA |
| LoxP4ot 5   | chr3:+67813766               | TAAGGTACTGGGGGAGGCAGT<br>TCA       | TTCCGGGAGCTGAACACAAGTG          |
| LoxP4ot 6   | chr4:+138451382              | ACTCCTGAGCTGAGAAACCAA<br>GACG      | GAGCCAGTGTCTTCAAGCTGT<br>TTT    |
| LoxP4ot 7   | chr16:+35402029              | CAATGGCTTCCAGACACCAGT<br>GTAC      | GTTCACACCTTCATCCCATTCCC         |
| LoxP4ot 8   | chr11:-96986362              | TGGGCAGCTGGCATTCTGTG               | TAGGGTAGCAGGTGTTCCGAGA<br>GG    |
| LoxP4ot 9   | chr16:+67621197              | AGATGCCAGCCTTGACACAGG<br>A         | GGTGCCGATTGGCTGAATTCTT          |
| LoxP4ot 10  | chr11:-34085573              | ACTTGATCTATGTCCATGCTAA<br>GAGTGATG | TCCTGTATGCTTTACTGGGGTTC<br>CT   |

**Table S5. Primer pairs to assess off target (ot) Cas9 activity during CRISPR-Cas9 insertion of loxP4.**

Genomic coordinates for potential off target regions were listed in the NCBI37/mm9 build. These primer pairs were used in SURVEYOR mutation assays. Forward (F) and reverse (R) primers were abbreviated accordingly and cycling conditions using JumpStart Taq can be found in [Table S2](#).
