# Supplementary material for: CRISPR/Cas9-Mediated Insertion of loxP Sites in the Mouse Dock7 Gene Provides an Effective Alternative to Use of Targeted Embryonic Stem Cells
Source: PubMed Central journal article supplement (PMC4938658; doi:10.1534/g3.116.030601), 2016-05-11
Supplement: supp_g3.116.030601_TableS6.pdf [file supp_g3.116.030601_TableS6.pdf]

| Primer pair | Off target site (NCBI37/mm9) | Forward (5'-3')                    | Reverse (5'-3')                    |
|-------------|------------------------------|------------------------------------|------------------------------------|
| LoxP5ot 1   | chr1:+6805634                | ACTTGATCTATGTCCATGCTAA<br>GAGTGATG | GACAAAATCCAACACCCATTCA<br>TGAT     |
| LoxP5ot 2   | chr14:+61414767              | CTTCAAGCCTGAAGACAGAAT<br>GAAAAGA   | CAAAAACCAGTCTCTATGTTCA<br>ATCAGGAT |
| LoxP5ot 3   | chr3:-95805557               | ATCTATTTAGGGACTTTGATGA<br>CTCACAGC | CAGTCTATCCATTTTTAGAGCTG<br>GGCA    |
| LoxP5ot 4   | chr1:-20708183               | ATGTACCATTTAGATGTCTGTC<br>AGGAACAC | GACAGAAACTCAGTTGGGCTAG<br>TCTGA    |
| LoxP5ot 5   | chr1:+65426077               | TGAACATTGGTTTTGGTTCCCA<br>G        | CAGCTCTCAGGACCTACCCATA<br>CTTGT    |
| LoxP5ot 6   | chr16:-36807690              | Too repetitive to design primers   | Too repetitive to design primers   |
| LoxP5ot 7   | chr5:-100040548              | TGCTCCATCTGACAGTCAAGGT<br>AGG      | GCAGGCCTGCCTGGAAGTTATG             |
| LoxP5ot 8   | chr14:+40469702              | CTCTCTCTCTCCTCCCTACCTCT<br>CCAC    | GGTAGCCTGCTGGCTAGTATGA<br>GAGG     |
| LoxP5ot 9   | chr4:-83614080               | G TTCCTTATTTCCCGATTTTCA<br>GAATAGG | AAGTTGCAATGGAGGACATCCC<br>A        |
| LoxP5ot 10  | chr11:+113188213             | AGTTCCCAAGTGTAAGCTCTTC<br>GGA      | TGTGTTTGGCCTCCAGTCTGTCC            |

**Table S6. Primer pairs to assess off target (ot) Cas9 activity during CRISPR-Cas9 insertion of loxP5.**

Genomic coordinates for potential off target regions were listed in the NCBI37/mm9 build. These primer pairs were used in SURVEYOR mutation assays. Forward (F) and reverse (R) primers were abbreviated accordingly and cycling conditions using JumpStart Taq can be found in [Table S2](#).
