# Supplementary material for: CRISPR/Cas9-Mediated Insertion of loxP Sites in the Mouse Dock7 Gene Provides an Effective Alternative to Use of Targeted Embryonic Stem Cells
Source: PubMed Central journal article supplement (PMC4938658; doi:10.1534/g3.116.030601), 2016-05-11
Supplement: supp_g3.116.030601_TableS7.pdf [file supp_g3.116.030601_TableS7.pdf]

| Primer pair | Off target site (NCBI37/mm9) | Forward (5'-3')        | Reverse (5'-3')                |
|-------------|------------------------------|------------------------|--------------------------------|
| LoxP6ot 1   | chr7:-60907931               | ATTGTCTCCCAAGGAAGAACTC | ACAGTGACCAGAATTAGAGTAT<br>AAGG |
| LoxP6ot 2   | chr6:-28463696               | TCTCCCTAGTCCTTCTGTGTAG | AGGCAGGAGGATCAGAAATTG          |
| LoxP6ot 3   | chr15:+72473382              | CCAATCCATCTTCTGACCTCTC | ATCATGGGCAGGTTCTTATC           |
| LoxP6ot 4   | chr14:-66373202              | CCATGGTTGCTGCGTTTAG    | GCACTGTTTCTTTCTTCACTCC         |
| LoxP6ot 5   | chr9:+79417635               | AAATGAAGGGACCTGTCTATGG | AAGTGTCAGACTTCCCAGTTAT         |
| LoxP6ot 6   | chr4:-115312664              | CAGTGATGAGGGTCTAAACAGG | GCTTCCATTATGATGTGCTGAAG        |
| LoxP6ot 7   | chr9:-64594834               | GTCAAAGCAGAGCTCACTAGAA | ATACTACTGCCTCTAGCCCAT          |
| LoxP6ot 8   | chr15:-99901206              | CAGGTTGGCTCAACTCTTGAT  | CTGTTGTCTGCCCTCCATTT           |
| LoxP6ot 9   | chr9:-34806732               | GCCTCTACTCTGTCTTGCTCTA | TGCGGATGCAGTCTTGTTATAC         |
| LoxP6ot 10  | chr13:+10377580<br>7         | ACCAACTGTAATGGGATCTGAC | CAGAGATAGGAGAACACACAGC         |
| LoxP6ot 11  | chr9:+89702030               | CTTCATAGCTCCTCCCAATCAG | GAGAGTCAGGCAATACCAAAGA         |
| LoxP6ot 12  | chr17:+30398181              | AATGCAAGCACTCCATCAAATC | TCTTGTCTCAAGTGTCAAAGG          |

**Table S7. Primer pairs to assess off target (ot) Cas9 activity during CRISPR-Cas9 insertion of loxP6.**

Genomic coordinates for potential off target regions were listed in the NCBI37/mm9 build. These primer pairs were used in SURVEYOR mutation assays. Forward (F) and reverse (R) primers were abbreviated accordingly and cycling conditions using JumpStart Taq can be found in [Table S2](#).
