# Supplementary material for: CRISPR/Cas9-Mediated Insertion of loxP Sites in the Mouse Dock7 Gene Provides an Effective Alternative to Use of Targeted Embryonic Stem Cells
Source: PubMed Central journal article supplement (PMC4938658; doi:10.1534/g3.116.030601), 2016-05-11
Supplement: supp_g3.116.030601_TableS9.pdf [file supp_g3.116.030601_TableS9.pdf]

| Target site         | Injection type | Non-transgenic (%) | 5' LoxP (%) | 3' LoxP (%) | 5' and 3' LoxP (%) | Deletion (%) | Null coat color (%) | Correctly Targeted (%) |
|---------------------|----------------|--------------------|-------------|-------------|--------------------|--------------|---------------------|------------------------|
| <i>Dock7</i> cKO1-1 | Pronuclear     | 2.7                | 1.3         | 2.7         | 1.3                | 2.7          | 0                   | 0                      |
| <i>Dock7</i> cKO1-2 | Cytoplasmic    | 17.4               | 5.16        | 4.5         | 1.9                | 9.7          | 3.22                | 0.65                   |
| <i>Dock7</i> cKO2   | Cytoplasmic    | 6.3                | 4.0         | 1.72        | 0.57               | 5.7          | 2.9                 | 0.57                   |

**Table S9. Frequency of CRISPR-Cas9-mediated loxP insertion in the *Dock7* locus.** The data found in [Table3](#) and [Table S8](#) was calculated as a percentage based on the total number of transferred embryos.
